# Supplementary material for: Relationship between paramacular thinning, cerebral vasculopathy, and hematological risk factors in sickle cell disease
Source: PubMed Central journal article supplement (PMC10493280; doi:10.3389/fmed.2023.1226210), 2023-08-28
Supplement: Table_1.pdf [file Table_1.pdf]

|                                    | Visual acuity | SCDM    | Stage of Goldberg classification |
|------------------------------------|---------------|---------|----------------------------------|
| Intraclass correlation coefficient | 0.788         | 0.762   | 0.863                            |
| p (Fisher test)                    | < 0.001       | < 0.001 | < 0.001                          |
| Cronabch Alpha                     | 0.788         | 0.762   | 0.863                            |

Table suppl n° 1
